# Low Temperatures Lead to Higher Toxicity of the Fungicide Folpet to Larval Stages of *Rana temporaria* and *Bufo viridis*

1 **Christoph Leeb<sup>1\*</sup>, Laura Schuler<sup>1</sup>, Carsten A. Brühl<sup>1</sup>, Kathrin Theissinger<sup>1,2</sup>**

2 <sup>1</sup>iES Landau, Institute for Environmental Sciences, University of Koblenz-Landau, Landau, Germany

3 <sup>2</sup>LOEWE Centre for Translational Biodiversity Genomics, Senckenberg Biodiversity and Climate  
4 Research Centre, Frankfurt, Germany

5

6 **\* Correspondence:**

7 Christoph Leeb

8 [leeb@uni-landau.de](mailto:leeb@uni-landau.de)

9

10 Short title: **Temperature Dependent Toxicity of Folpet**

11

12 **Keywords: amphibia, climate change, green toad, common frog, pesticide, sensitivity, tadpole,**  
13 **temperature effect**

14 Number of words: 3,497

15 Number of figures: 1

16

## 17 Abstract

18 Pesticides are one of the main drivers of the worldwide amphibian decline. Their actual toxicity  
19 depends on a number of factors, like the species in focus or the developmental stage of exposed  
20 individuals. As ectothermic species, the metabolism of amphibians is influenced by ambient  
21 temperature. Therefore, temperature also affects metabolic rates and thus processes that might enhance  
22 or reduce toxic effects. Studies about the interactive effect of temperature and toxicity on amphibians  
23 are rare and deliver contrasting results. To investigate the temperature-dependent pesticide sensitivity  
24 of larvae of two European species we conducted acute toxicity tests for the viticultural fungicide  
25 Folpan® 500 SC with the active ingredient folpet at different temperatures (6°C, 11°C, 16°C, 21°C,  
26 26°C). Sensitivity of *Rana temporaria* and *Bufo viridis* was highly affected by temperature: early  
27 larvae (Gosner stage 20) were about twice more sensitive to Folpan® 500 SC at 6°C compared to 21°C.  
28 Next to temperature, species and developmental stage of larvae had an effect on sensitivity. The most  
29 sensitive individuals (early stages of *R. temporaria* at 6°C) were 14.5 times more sensitive than the  
30 least sensitive ones (early stages of *B. viridis* at 26°C). Our results raise concerns about typical  
31 ecotoxicological studies with amphibians that are often conducted at temperatures between 15°C and  
32 20°C. We suggest that future test designs should be performed at temperatures that reflect the  
33 temperature range amphibians are exposed to in their natural habitats. Variations in the sensitivity due  
34 to temperature should also be considered as an uncertainty factor in upcoming environmental risk  
35 assessments for amphibians.

## 36 1 Introduction

37 To improve crop yields about 360 million kg of pesticide formulations are used per year on agricultural  
38 fields in the European Union (data from 2017; Eurostat, 2020). Only a small part of these pesticides  
39 reaches their target organism [2], and due to spray drift and run-off they can get into water bodies

40 within or near agricultural fields [3,4]. Such agricultural ponds can be important breeding habitats for  
41 amphibians [5–7], which are therefore exposed to pesticides during their aquatic life stages. Pesticides  
42 were shown to have adverse effects on amphibians in several studies (e.g. [8–12], and are consequently  
43 identified as one of the main drivers in the global amphibian decline [13,14]. The actual toxicity of  
44 pesticides for amphibians depends on a number of factors, including the active ingredients [8],  
45 formulation additives [9,10,15], the species in focus [12], a previous exposure to pesticides [10,11] and  
46 the developmental stage [10,12,16] of the tested individuals.

47 Also water temperature during pesticide exposure of larvae has an impact on the toxicity. Amphibians  
48 are ectothermic species and behavior and physiology are fundamentally influenced by environmental  
49 temperature [17]. Therefore, metabolic rates and thus processes that might enhance or reduce toxic  
50 effects, like the uptake of substances, the metabolic oxygen demand, and detoxification processes are  
51 temperature-dependent [18]. However, studies on the combined effects of temperature and pesticides  
52 on amphibians reveal contrasting results. Some observed that higher temperatures increased toxicity  
53 [19–21], while others showed a reduced toxic effect of pesticides on exposed amphibians [22–24]. For  
54 *Oligosoma polychroma*, a skink (reptile) and thus also an ectothermic vertebrate species, even a heat-  
55 seeking behavior was observed, that can be interpreted as response to increase the metabolism to better  
56 deal with stress after exposure to a glyphosate formulation [25].

57 Detailed knowledge of the relationship of pesticide sensitivity and temperature is central for two  
58 reasons. First, we are facing a global warming caused by climate change with more frequent  
59 temperature extremes [26]. Understanding the combined effect of this temperature increase and  
60 pesticides will help to better estimate the impact of climate change on amphibian populations, to  
61 identify potential threats on species and to set mitigation measures. Second, laboratory toxicity tests  
62 for pesticides with amphibian larvae are typically performed at temperatures between 15°C and 20°C  
63 (e.g. Mann et al., 2003; Johansson et al., 2006; Brühl et al., 2013; Wagner et al., 2017). These standard

64 temperatures might not reflect the natural range of temperatures at which a species is exposed to  
65 pesticides in its habitat. For example, larvae of *Rana temporaria* can be found in European ponds with  
66 water temperatures only a few degrees above the freezing point [27]. In this study, the average water  
67 temperature during the aquatic development was 9.7°C and the maximum temperature 23°C [27].  
68 However, in small water bodies the maximum water temperatures might be above 30°C, as even in  
69 high-altitudes breeding ponds with temperatures of up to 26.5°C can be found [28]. Therefore, standard  
70 laboratory toxicity tests might lead to the underestimation of possible sublethal or even lethal effects  
71 that occur at lower or higher temperatures. Thus, knowing the temperature at which amphibians are  
72 most sensitive will allow a more reliable assessment of the actual risk of pesticides.

73 In the present study, we conducted aquatic acute toxicity tests at temperatures between 6°C and 26°C  
74 to investigate the effect of the temperature on the sensitivity of amphibian larvae to the fungicide  
75 Folpan® 500 SC with the active ingredient folpet. With up to eight applications per growing season,  
76 folpet is, next to sulfur, the most common fungicide in German vineyards and is preventively used to  
77 protect plants primarily from mildew [29]. In general, fungicides are underrepresented in  
78 ecotoxicological studies compared to other pesticide classes [30]. To identify potential species and  
79 developmental stage specific differences in pesticide sensitivity, we tested early and late larval stages  
80 of the common frog (*Rana temporaria* Linnaeus, 1758) and the green toad (*Bufo viridis* Laurenti,  
81 1768), two temperate species that can be found in breeding ponds in German vineyards [6]. Both  
82 species are listed as “least concern” by the IUCN [31,32] and are widespread in Europe. *R. temporaria*  
83 is discussed as a model organism for European amphibian species in toxicological studies [33]. This  
84 species uses a variety of different water bodies for mating, which usually takes place in March, but can  
85 start as early as the end of January [34] when water temperatures are above 5°C for some days [34,35].  
86 However, even at temperatures only a few degrees above freezing point spawning can be observed [36]  
87 and early larvae can be found [27]. Preferred temperatures of early *R. temporaria* larvae from Germany

88 are between 14.8°C and 19.6°C, and between 16.5°C and 26.0°C of late larvae stages [37]. In contrast  
89 to *R. temporaria*, *B. viridis* is considered to be a thermophile species with preferred spawning  
90 temperatures between 16°C and 20°C. The optimum thermal tolerance limits for early larvae are  
91 between 12°C and 25°C [38].

92 The aim of the study was to get a better understanding about the temperature-dependent pesticide  
93 sensitivity of two European amphibian species. We hypothesized 1) that the sensitivity of larvae to  
94 Folpan® 500 SC is highly affected by water temperature, 2) that early larvae are more sensitive than  
95 late larval stages (see Adams and Brühl, 2020), and 3) that pesticide sensitivity differs between species.

## 96 2. Material and methods

### 97 2.1 Sampling and animal husbandry

98 Up to 300 eggs of eight and seven different clutches of *R. temporaria* and *B. viridis*, respectively, were  
99 collected in March and May 2018. The spawning pond of *R. temporaria* is located in the Palatinate  
100 Forest (Rhineland-Palatinate, Germany; 49.262433 N, 8.061896 E (WSG84), 242 m asl), distant from  
101 any pesticide use. The pond of the *B. viridis* population is located in a vineyard dominated area  
102 (Rhineland-Palatinate, Germany; 49.317490 N, 8.129091 E (WSG84), 194 m asl). Thus, the pond can  
103 be expected to be contaminated with various pesticides. Eggs were transferred to glass aquaria (30 x  
104 20 x 20 cm) filled with tap water and kept in a climate chamber at 16°C with a 16:8 day-night-rhythm.  
105 For logistical reasons, not all acute toxicity tests for the same developmental stage were conducted at  
106 the same time. Therefore, parts of each clutch were kept at 10°C and daylight to slow down the  
107 development of the eggs. After hatching, larvae were kept in groups of 50 individuals in aerated glass  
108 aquaria filled with tap water at 21°C. As the larvae grew, we reduced their density to 20 larvae per  
109 aquaria. Cleaning of the aquaria and water renewal took place every second day. Larvae were fed daily  
110 *ad libitum* with commercial fish food, cooked salad, and cucumber.

## 111 2.2 Test substance

112 The fungicide Folpan® 500 SC (ADAMA Deutschland GmbH, Germany; purchased from a local  
113 distributor) with the active ingredient folpet (38-42% of weight; CAS number 133-07-03) was used for  
114 all tests. Folpet is an organochlorine phthalimide with a molecular weight of 296.6 g/mol and is used  
115 as a protective, broad-spectrum fungicide against leaf spot diseases in grapevines. Data on  
116 environmental contaminations are rare, but maximum measured concentrations of 50 ng/L in rivers  
117 [39] and 4.53 µg/L in ponds [40] have been reported. To assess the environmental realistic toxicity  
118 effect, the formulation was tested instead of the pure active ingredient. Other formulation ingredients  
119 are "alkylnaphthalensulfonic acid, polymer with formaldehyde, sodium salt" (3.5-5%), fumaric acid  
120 (1-1.5%), methenamine (0.5-1%) and 1,2-Benzisothiazoline-3-one (<0.1%). The acute aquatic toxicity  
121 of the formulation leads to a 96-h LC<sub>50</sub> of 0.256 mg Folpan/L for the rainbow trout  
122 (*Oncorhynchus mykiss*) [41].

## 123 2.3 Experimental design

124 Acute toxicity of Folpan® 500 SC was determined in a full-factorial design with different temperature  
125 conditions and two developmental stages of both species. Early larval stages (Gosner stage 20; GS20;  
126 first hatchling stage with external gill circulation; see Gosner (1960) for classification) were tested at  
127 five different temperatures (6°C, 11°C, 16°C, 21°C, 26°C). Late larval stages (Gosner stage 36-41;  
128 GS40; larvae with at least hindlimbs) were tested at three different temperatures (6°C, 16°C, 26°C).  
129 For each combination of temperature, species and developmental stage (= 16 combinations in total), a  
130 48 h static acute toxicity test was performed with six different pesticide concentrations, ranging  
131 between 0 (control) and 4.2 mg Folpan/L (see Supplementary Table 1). Fungicide concentrations were  
132 chosen based on range-finding tests and previous studies with folpet [16,43] to cover the concentration  
133 range at which ideally 0-100% mortality of the test organisms should be observed. Range finding tests

134 were performed as 48 h tests with three Folpan concentrations and a control group with three replicates  
135 of one individual for each species/developmental stage and different temperatures. For each pesticide  
136 concentration of the final acute toxicity test 25 (GS20) or 15 (GS40) individuals were used, resulting  
137 in 150 and 90 individuals per test, respectively. Tests were conducted in 1.7 L glass jars containing 1L  
138 FETAX medium [44] and the respective amount of Folpan® 500 SC. Before adding the folpet  
139 formulation, the jars with the FETAX medium were cooled or heated to the test temperature in climate  
140 chambers (WK 19/+15-35, Weiss Technik GmbH, Reiskirchen, Germany; MLR-351H SANYO  
141 Versatile Environmental Test Chamber, SANYO Electric Co. Ltd., Moriguchi, Japan). To reduce the  
142 influence of thermal shock on the physiology of the animals, preselected larvae from different clutches  
143 of about the same size and developmental stage (GS20 or GS40) showing normal behavior were placed  
144 in plastic boxes and acclimated at least for one hour to the test temperature. Afterwards five (GS20) or  
145 three (GS40) larvae were randomly placed in a test jar, resulting in five replicates/jars per pesticide  
146 concentration. For each jar, the mortality of larvae was determined after 48 h of exposure, whereby  
147 dead larvae were removed after 2 h and 24 h from the test jars. In accordance with the test guideline  
148 for acute toxicity testing in fish (OECD test guideline No. 203, [45]), larvae were not fed during the  
149 experimental period. Tests were performed in climate chambers set to the according test temperature  
150 with a 16:8 day-night-rhythm.

## 151 **2.4 Statistical analysis**

152 For each test the median lethal concentration causing 50% mortality of test organisms ( $LC_{50}$  value)  
153 was determined using different concentration-response models (log-normal functions - LN.2, LN.3,  
154 LN.4; log-logistic functions - LL.2, LL.3u, LL.4, LL.5; and Weibull-functions - W1.2, W1.3, W1.4,  
155 W2.2, W2.3, W2.4) calculated with the R package “drc” [46]. To get the most accurate  $LC_{50}$  value, the  
156 model that best describes the observed mortality of larvae was selected based on the lowest Akaike’s  
157 Information Criterion for each test.  $LC_{50}$  values between different test temperatures for the same

158 species and development stage were compared by a confidence interval overlap test [47] with the  
159 function “comped” implemented in “drc”. As we hypothesised a correlation between temperature and  
160 toxicity, we tested the LC<sub>50</sub> of a species/developmental stage at a temperature only against the LC<sub>50</sub>  
161 of the next higher temperature to reduce the probability of an alpha error accumulation. In case the  
162 difference was not significant, we also tested against the two steps higher temperature. Confidence  
163 interval overlap tests were also used to compare LC<sub>50</sub> values between species and development stages  
164 at the same test temperature. For all comparisons, p-values were calculated following the method  
165 described by Altman & Bland [48]. When testing the same species and developmental stage at different  
166 temperatures, or the same species or developmental stage at different temperatures, p-values were  
167 adjusted with a Bonferroni correction. All statistical analyses were carried out in R (version 3.4.3; R  
168 Core Team, 2019).

## 169 2.5 Animal welfare

170 The study was approved by the Landesuntersuchungsamt in Koblenz (Germany; approval number  
171 G18-20-009), and the collection of clutches and the husbandry of larvae were permitted by the  
172 ”Struktur- und Genehmigungsdirektion Süd Referat 42 - Obere Naturschutzbehörde” (Neustadt an der  
173 Weinstraße, Germany; approval number: 42/553-254/455-18). After the experiments all test organisms  
174 were euthanized with a buffered 0.1% MS-222 solution.

175

176

## 177 3 Results

178 The calculated LC<sub>50</sub> values of Folpan® 500 SC ranged between 0.30 and 2.90 mg Folpan/L for *R.*  
179 *temporaria* and 0.64 and 4.35 mg Folpan/L for *B. viridis* (Table 1). Toxicity decreased (i.e. increasing



180 LC<sub>50</sub> values) with increasing temperature for both tested species and developmental stages (see Fig. 1).  
181 In particular, the LC<sub>50</sub> of GS20 at 21°C, the temperature at which toxicity tests are often conducted,  
182 was 2 (*R. temporaria*) and 2.3 (*B. viridis*) times higher than the lowest observed LC<sub>50</sub> value. A  
183 temperature increase from 6°C to 16°C resulted in 1.7 to 2.0 and an increase from 16°C to 26°C in 1.2  
184 to 3.8 times higher LC<sub>50</sub> values. A temperature increase of 5°C (GS20) or 10°C (GS40) resulted always  
185 in a significantly higher LC<sub>50</sub> value (all  $p \leq 0.038$ , see Table 1), except for the comparison of 6°C and  
186 11°C in GS20 in both species and 11°C and 16°C in GS20 *R. temporaria*. In general, the most sensitive  
187 individuals (*R. temporaria* GS20 at 6°C) were 14.5 times more sensitive than the least sensitive ones  
188 (*B. viridis* at GS20 26°C). Our analysis revealed that early larvae were more sensitive than late larvae,  
189 with the exception of *B. viridis* at 26°C (Table 2). Comparing LC<sub>50</sub> values between species showed  
190 that *R. temporaria* is more sensitive in early and less sensitive in late developmental stages than *B.*  
191 *viridis* (Table 3), suggesting an interaction between developmental stage and species. However, the  
192 difference was not significant when comparing late developmental stages at 16°C and 26°C after a  
193 Bonferroni correction. Across all temperature treatments in both developmental stages and species the  
194 control and lowest concentration of 0.1 mg Folpan/L did not lead to any mortality in tested larvae.

195

196 **Figure 1:** Calculated LC<sub>50</sub> values ( $\pm$  95% CI) of early (GS20) and late (GS40) developmental stages  
197 of *R. temporaria* and *B. viridis* at different temperatures. For detailed values and differences between  
198 temperatures see Table 1.

199

200

201 **Table 1:** Calculated LC<sub>50</sub> values for two developmental stages of *R. temporaria* and *B. viridis* at  
 202 different temperatures with 95% confidence intervals and the used dose-response models. P-values  
 203 show results from confidence interval overlap tests when testing against the next higher temperature.  
 204 In case the difference was not significant, it was also tested against the two steps higher temperature.  
 205 Significant differences after Bonferroni-correction are presented in bold.

| Developmental stage                | T (°C) | Model | LC <sub>50</sub> (mg Folpan/L) | 95% CI (mg Folpan/L) | p (to next temperature)              |
|------------------------------------|--------|-------|--------------------------------|----------------------|--------------------------------------|
| <b>GS20</b>                        | 6      | W2.2  | 0.30                           | 0.28 - 0.31          | 0.172 (11°C) / < <b>0.001</b> (16°C) |
|                                    | 11     | W2.2  | 0.39                           | 0.29 - 0.49          | 0.120 (16°C) / < <b>0.001</b> (21°C) |
|                                    | 16     | W2.2  | 0.52                           | 0.44 - 0.59          | <b>0.001</b>                         |
|                                    | 21     | W2.2  | 0.68                           | 0.66 - 0.70          | < <b>0.001</b>                       |
|                                    | 26     | W1.2  | 1.12                           | 1.10 - 1.15          | -                                    |
| <i>Rana temporaria</i> <b>GS40</b> | 6      | W2.2  | 1.29                           | 1.22 - 1.36          | < <b>0.001</b>                       |
|                                    | 16     | W2.2  | 2.37                           | 2.20 - 2.53          | <b>0.004</b>                         |
|                                    | 26     | W2.2  | 2.90                           | 2.79 - 3.00          | -                                    |
| <i>Bufoles viridis</i> <b>GS20</b> | 6      | W2.2  | 0.64                           | 0.57 - 0.71          | 0.528 (11°C) / < <b>0.001</b> (16°C) |
|                                    | 11     | W2.2  | 0.69                           | 0.61 - 0.76          | < <b>0.001</b>                       |

|             |    |      |      |             |                   |
|-------------|----|------|------|-------------|-------------------|
|             | 16 | LN.2 | 1.15 | 1.09 - 1.21 | <b>0.038</b>      |
|             | 21 | W2.2 | 1.28 | 1.20 - 1.36 | <b>&lt; 0.001</b> |
|             | 26 | W2.2 | 4.35 | 4.19 - 4.50 | -                 |
| <b>GS40</b> | 6  | LN.2 | 1.04 | 0.95 - 1.14 | <b>&lt; 0.001</b> |
|             | 16 | W2.2 | 2.06 | 1.87 - 2.26 | <b>&lt; 0.001</b> |
|             | 26 | W1.2 | 2.56 | 2.32 - 2.80 | -                 |

206

207 **Table 2:** Comparison of LC<sub>50</sub> values between developmental stages. Significant differences after  
 208 Bonferroni-correction are presented in bold.

| Species              | T (°C) | GS20 vs. GS40     |
|----------------------|--------|-------------------|
| <i>R. temporaria</i> | 6      | <b>&lt; 0.001</b> |
|                      | 16     | <b>&lt; 0.001</b> |
|                      | 26     | <b>&lt; 0.001</b> |
| <i>B. viridis</i>    | 6      | <b>&lt; 0.001</b> |
|                      | 16     | <b>&lt; 0.001</b> |
|                      | 26     | <b>&lt; 0.001</b> |

209

210 **Table 3:** Comparison of LC<sub>50</sub> values between species. Significant differences after Bonferroni-  
 211 correction are presented in bold.

| Developmental stage | T (°C) | <i>R. temporaria</i> vs. <i>B. viridis</i> |
|---------------------|--------|--------------------------------------------|
| GS20                | 6      | <b>&lt; 0.001</b>                          |
|                     | 11     | <b>&lt; 0.001</b>                          |
|                     | 16     | <b>&lt; 0.001</b>                          |
|                     | 21     | <b>&lt; 0.001</b>                          |
|                     | 26     | <b>&lt; 0.001</b>                          |
| GS40                | 6      | <b>0.002</b>                               |
|                     | 16     | 0.088                                      |
|                     | 26     | 0.063                                      |

212

213

#### 214 **4 Discussion**

215 In the present study, we demonstrated that the pesticide sensitivity of two European amphibian species  
 216 is highly affected by temperature, with individuals of both tested developmental stages and species  
 217 being more sensitive at lower temperatures. As we did not observe mortality at any temperature in  
 218 controls, the tested temperatures are within a range that allows survival. Therefore, observed mortalities

219 are caused by Folpan® 500 SC, where the lethal concentration depends on the temperature.  
220 Explanations for the relationship between temperature and sensitivity are diverse and depending on the  
221 pesticide and organism in focus, but exact mechanisms often remain unknown. In our study, higher  
222 temperatures might be nearer to the optimal temperature of the tested individuals, allowing effective  
223 metabolism and detoxification. Likewise, low temperatures might be below the optimal temperature  
224 range and result in additional stress, limiting the ability to cope with Folpan® 500 SC. Observed results  
225 might also be caused by the characteristics of folpet, the active ingredient of the tested formulation  
226 Folpan® 500 SC. In general, folpet degrades rapidly in aquatic environments and shows a half-life  
227 (DT50) of 0.7 h at 25°C and 0.178 h at 40°C (both pH 7; EFSA, 2009). Further, the degradation depends  
228 on the pH of the medium (DT50 pH 4, 25°C = 6.5 h; DT50 pH 4, 40°C = 1.06 h; DT50 pH 9, 25°C and  
229 40°C = too rapid to measure; EFSA, 2009). Thus, the alkaline FETAX medium (ranging between pH  
230 7.7 and 8.29 in our study) even accelerates the degradation. Although information about the  
231 degradation below 25°C is lacking, a temperature-dependent degradation that could have caused the  
232 observed effects can be expected. Because of the overall fast degradation, no analysis of the actual  
233 folpet concentration at the start and the end of a test was possible. It remains also unknown if the  
234 degradation of the formulation Folpan® 500 SC is similar to its active ingredient folpet, as additives  
235 could increase the stability of the formulation. Additives might also influence the toxicity of the  
236 formulation [9,10,15,51]. Regardless whether the lower sensitivity at higher temperatures is caused by  
237 a more effective metabolism and detoxification, and thus reduced bioaccumulation, or by an increased  
238 degeneration of folpet, Folpan® 500 SC is more toxic for the two tested amphibian species at lower  
239 temperatures.

240 Thus, increasing environmental temperatures might seem to have a positive effect on amphibians in  
241 terms of a reduced folpet toxicity. However, climate warming will also cause a shift in the breeding  
242 season to an earlier time of the year in temperate species [52]. Lötters et al. [53] showed that a shift of

243 one month could decrease the glyphosate exposure risk during their migration to the breeding pond to  
244 about 50% for *R. temporaria*. Thus, also the exposure risk of larvae might be reduced. However,  
245 increased temperatures will also result in an earlier vegetation period of crops [54,55] and pesticides  
246 might be applied earlier. Consequently, the general exposure risk, but also the temperature at which  
247 amphibians will be exposed to pesticides in their aquatic habitats, will probably not change  
248 fundamentally. However, also more frequent temperature extremes can be expected [26], resulting in  
249 regional and temporary temperature drops so that also later larvae might be exposed to low  
250 temperatures. Climate change will also cause more frequent pesticide applications [56,57], resulting in  
251 higher overall pesticide loads in water bodies. Already today, many different pesticides can be found  
252 in ponds within agriculture [58,59]. Although higher temperatures might result in a lower sensitivity  
253 to folpet, contrary effects are possible for other pesticides and pesticide mixes. In vineyards, folpet is  
254 usually applied first in late May [60], when *R. temporaria* larvae occur in late development stages. At  
255 this time, *B. viridis* is still spawning and thus early larvae can be found. Only few data on actual  
256 environmental contamination with folpet are available and data show that maximum measured  
257 concentrations (50 ng/L [39]; 4.53 µg/L, [40]) are by a factor of at least 66 below the lowest LC<sub>50</sub>  
258 values obtained in our study. We can therefore conclude that this pesticide will most likely not lethally  
259 affect the two tested amphibian species at the larval stage, but sublethal effects cannot be excluded.  
260 Thus, future studies should also focus on the effect of the temperature on sublethal endpoints like  
261 development or behavior.

262 Our results are in contrast to most studies that investigated the effect of temperature on pesticide  
263 toxicity for amphibian larvae in acute toxicity studies. In Materna et al. [20] leopard frog larvae  
264 (*Lithobates sp.*; former *R. pipiens* complex) showed higher mortalities in 96-h acute toxicity tests for  
265 the pyrethroid insecticide esfenvalerate at 22°C than at 18°C. Boone and Bridges [19] found the same  
266 relationship for *L. clamitans* (former *R. clamitans*) as the 96h-LC<sub>50</sub> at 27°C was two times higher than

267 at 17°C. Lau et al. [21] calculated 96h-LC<sub>50</sub> values for the pesticide methomyl for three Asian  
268 amphibian species (*Duttaphrynus melanostictus*, *Polypedates megacephalus*, *Microhyla pulchra*) at  
269 temperatures between 15°C and 35°C, and observed lower 96h-LC<sub>50</sub> values at higher temperatures.  
270 However, Chiari et al. [24] showed that increased temperature can also reduce the toxicity of a pesticide  
271 in 96-h acute toxicity tests by comparing published LC<sub>50</sub> values for copper sulfate of various amphibian  
272 species. In contrast to most 96-h tests, reduced toxic effects of pesticides at higher temperatures can  
273 also be found in studies with tests running over several weeks or until metamorphosis. Baier et al. [23]  
274 found that the effects of the glyphosate formulation Roundup® PowerFlex on mortality, growth and  
275 tail deformation of the common toad (*Bufo bufo*) were more pronounced at 15°C than at 20°C. In a  
276 study on the glyphosate formulation Roundup® LB Plus, Baier et al. [22] also found increased effects  
277 on the development of common toad larvae at lower temperatures (15°C compared to 20°C) when  
278 exposure occurred already as egg. Rohr et al. [61] reported that an increased temperature reduced the  
279 time to the metamorphosis of larval *Ambystoma barbouri* exposed to the herbicide atrazine. Hence,  
280 also the total exposure to atrazine was reduced in this study, which ameliorated increased adverse  
281 effects of the pesticide [61].

282 With the exception of *B. viridis* at 26°C, early larval stages were 1.6 to 4.5 times more sensitive than  
283 late stages in both tested species. This is in line with the results from Adams and Brühl [16], where  
284 early larvae of *R. temporaria* (Gosner stage 20) were two times more sensitive than late larvae (Gosner  
285 stage 36) to the fungicide Folpan® 80 WDG with the same active ingredient folpet. Also Wagner et  
286 al. [10] found late larval stages of *R. temporaria* to be less sensitive in acute tests with two herbicides.  
287 Interestingly, in our study early larvae of *B. viridis* at 26°C were least sensitive. *Bufo viridis* is a  
288 thermophilic species, and the highest tested temperature is at the upper limit of its optimal thermal  
289 range for development of early larvae (12°C - 25°C; Derakhshan and Nokhbatolfoghahai, 2015).  
290 Hence, 26°C might allow optimal detoxification without causing temperature stress for early stages. In

291 late larval stages additional stress caused by processes linked to metamorphosis could countervail the  
292 advantages of high temperatures, resulting in late larvae of *B. viridis* being more sensitive than early  
293 larvae. Further, the optimal temperature of late *B. viridis* larvae could be even higher than 26°C. This  
294 might also explain why late larvae of *R. temporaria* (with assumed lower optimal temperature) were  
295 less sensitive than *B. viridis*, although *R. temporaria* is more sensitive in early stages. In general,  
296 species [12] and even population [10,11] specific differences in pesticide sensitivity are known. For  
297 example, Adams et al. [43] showed that out of eight central European amphibian species, the most  
298 sensitive species was five-times more sensitive than the least sensitive species towards the pesticide  
299 folpet. Therefore, differences in the sensitivity in our study species are not surprising. However, the  
300 original breeding pond where *B. viridis* eggs were obtained was situated within viticulture. Thus, it  
301 cannot be ruled out that differences in the sensitivity are the result of an adaption of the population to  
302 pesticides and not a species effect.

303 Folpet is, next to sulfur, the most common fungicide in German vineyards and thus understanding its  
304 toxicity on non-target organisms is of high relevance. However, the fast and temperature dependent  
305 degradation of folpet limits the conclusions drawn from our study. Thus, we recommend that future  
306 studies on the relationship of temperature and sensitivity of amphibians should focus on pesticides with  
307 a longer degradation time, not influenced as much by temperature. It might also be worth to consider  
308 pesticide mixtures, as often several formulations are applied at the same time [60] and a mixture of  
309 pesticides can be found in agricultural ponds [40]. It has recently been shown that the developmental  
310 temperature prior to ecotoxicological tests can have an influence on the organisms' sensitivity to a test  
311 substance (Silva et al 2020) and should consequently also be considered in future amphibian tests.

312 To date, no standard test guideline for acute toxicity tests of European amphibian species exists and  
313 amphibians are also not explicitly considered in the environmental risk assessment of pesticides. The  
314 results of our study raise concerns about typical ecotoxicological studies with amphibians that are often



315 conducted at temperatures between 15°C and 20°C, because early larvae at 6°C were about two times  
316 more sensitive to Folpan® 500 SC as at 21°C. Therefore, adverse effects in temperate amphibian  
317 species might only be observed at lower or, depending on the tested pesticide, higher temperatures.  
318 Based on the results we obtained in our study we conclude that an additional temperature related factor  
319 needs to be incorporated in an uncertainty factor of an upcoming environmental risk assessments for  
320 amphibians in the EU that reflects variations in pesticide sensitivity due to temperature. Additionally,  
321 we agree with recommendations of previous studies [19,21–23] that future test protocols should  
322 consider temperature as an important factor. Tests should be performed at temperatures that are  
323 reflecting the temperature range amphibians are exposed to in their natural habitats, possibly also  
324 including natural daily temperature fluctuations.

325

## 326 **5 Conflict of interest**

327 The authors declare that the research was conducted in the absence of any commercial or financial  
328 relationships that could be construed as a potential conflict of interest.

## 329 **6 Author contributions**

330 CL, CB and KT conceived and designed the study. CL and LS performed the experiment. CL and LS  
331 analyzed the data and drafted the manuscript. KT acquired the funding of the project and supervised  
332 the work together with CB. All authors contributed to the writing process and approved the final  
333 manuscript.

## 334 **7 Funding**

335 This project was financed by the Deutsche Forschungsgesellschaft (DFG-TH 1807-2).

## 336 **8 Acknowledgments**

337 We want to thank Elena Adams, Haiying Xia, Cedric Abele and Jana Huhle for their help in the  
338 laboratory.

## 339 **9 Data availability statement**

340 The original contributions presented in the study are included in the article/supplementary files, further  
341 inquiries can be directed to the corresponding author/s.

342

## 343 **10 Literature**

- 344 1. Eurostat. Pesticide sales in the EU 2017 [Internet]. 2020 [cited 9 Feb 2020]. Available:  
345 [https://appsso.eurostat.ec.europa.eu/nui/show.do?query=BOOKMARK\\_DS-](https://appsso.eurostat.ec.europa.eu/nui/show.do?query=BOOKMARK_DS-382683_QID_1F97D137_UID_-3F171EB0&layout=PESTICID,L,X,0;TIME,C,X,1;GEO,L,Y,0;UNIT,L,Z,0;INDICATORS,C,Z,1;&zSelection=DS-382683UNIT,KG;DS-382683INDICATORS,OBS_FLAG;&rankName1=UNIT_1_2_-1_2&)  
346 [382683\\_QID\\_1F97D137\\_UID\\_-](https://appsso.eurostat.ec.europa.eu/nui/show.do?query=BOOKMARK_DS-382683_QID_1F97D137_UID_-3F171EB0&layout=PESTICID,L,X,0;TIME,C,X,1;GEO,L,Y,0;UNIT,L,Z,0;INDICATORS,C,Z,1;&zSelection=DS-382683UNIT,KG;DS-382683INDICATORS,OBS_FLAG;&rankName1=UNIT_1_2_-1_2&)  
347 [3F171EB0&layout=PESTICID,L,X,0;TIME,C,X,1;GEO,L,Y,0;UNIT,L,Z,0;INDICATORS,C,](https://appsso.eurostat.ec.europa.eu/nui/show.do?query=BOOKMARK_DS-382683_QID_1F97D137_UID_-3F171EB0&layout=PESTICID,L,X,0;TIME,C,X,1;GEO,L,Y,0;UNIT,L,Z,0;INDICATORS,C,Z,1;&zSelection=DS-382683UNIT,KG;DS-382683INDICATORS,OBS_FLAG;&rankName1=UNIT_1_2_-1_2&)  
348 [Z,1;&zSelection=DS-382683UNIT,KG;DS-](https://appsso.eurostat.ec.europa.eu/nui/show.do?query=BOOKMARK_DS-382683_QID_1F97D137_UID_-3F171EB0&layout=PESTICID,L,X,0;TIME,C,X,1;GEO,L,Y,0;UNIT,L,Z,0;INDICATORS,C,Z,1;&zSelection=DS-382683UNIT,KG;DS-382683INDICATORS,OBS_FLAG;&rankName1=UNIT_1_2_-1_2&)  
349 [382683INDICATORS,OBS\\_FLAG;&rankName1=UNIT\\_1\\_2\\_-1\\_2&](https://appsso.eurostat.ec.europa.eu/nui/show.do?query=BOOKMARK_DS-382683_QID_1F97D137_UID_-3F171EB0&layout=PESTICID,L,X,0;TIME,C,X,1;GEO,L,Y,0;UNIT,L,Z,0;INDICATORS,C,Z,1;&zSelection=DS-382683UNIT,KG;DS-382683INDICATORS,OBS_FLAG;&rankName1=UNIT_1_2_-1_2&)
- 350 2. Pimentel D. Amounts of pesticides reaching target pests: Environmental impacts and ethics. *J*  
351 *Agric Environ Ethics*. 1995;8: 17–29. doi:10.1007/BF02286399
- 352 3. Zhang X, Luo Y, Goh KS. Modeling spray drift and runoff-related inputs of pesticides to  
353 receiving water. *Environ Pollut*. Elsevier Ltd; 2018;234: 48–58.  
354 doi:10.1016/j.envpol.2017.11.032
- 355 4. Reichenberger S, Bach M, Skitschak A, Frede H. Mitigation strategies to reduce pesticide  
356 inputs into ground- and surface water and their effectiveness; A review. *Sci Total Environ*.

- 357 2007;384: 1–35. doi:10.1016/j.scitotenv.2007.04.046
- 358 5. Knutson MG, Richardson WB, Reineke DM, Gray BR, Parmelee JR, Weick SE. Agricultural  
359 ponds support amphibian populations. *Ecol Appl.* 2004;14: 669–684. doi:10.1890/02-5305
- 360 6. Lenhardt PP, Schäfer RB, Theissinger K, Brühl CA. An expert-based landscape permeability  
361 model for assessing the impact of agricultural management on amphibian migration. *Basic*  
362 *Appl Ecol.* Elsevier GmbH; 2013;14: 442–451. doi:10.1016/j.baae.2013.05.004
- 363 7. Berger G, Pfeffer H, Kalettka T. Amphibienschutz in kleingewässerreichen Ackerbaugebieten.  
364 Rangsdorf: Natur & Text; 2011.
- 365 8. Johansson M, Piha H, Kylin H, Merilä J. Toxicity of six pesticides to common frog (*Rana*  
366 *temporaria*) tadpoles. *Environ Toxicol Chem.* 2006;25: 3164. doi:10.1897/05-685R1.1
- 367 9. Mann R, Tyler M, Bidwell J. Toxicity of herbicide formulations to frogs and the implications  
368 for product registration: A case study from Western Australia. *Appl Herpetol.* 2003;1: 13–22.  
369 doi:10.1163/157075403766451199
- 370 10. Wagner N, Veith M, Lötters S, Viertel B. Population and life-stage-specific effects of two  
371 herbicide formulations on the aquatic development of European common frogs (*Rana*  
372 *temporaria*). *Environ Toxicol Chem.* 2017;36: 190–200. doi:10.1002/etc.3525
- 373 11. Hua J, Morehouse NI, Relyea R. Pesticide tolerance in amphibians: Induced tolerance in  
374 susceptible populations, constitutive tolerance in tolerant populations. *Evol Appl.* 2013;6:  
375 1028–1040. doi:10.1111/eva.12083
- 376 12. Biga LM, Blaustein AR. Variations in lethal and sublethal effects of cypermethrin among  
377 aquatic stages and species of anuran amphibians. *Environ Toxicol Chem.* 2013;32: 2855–

- 378 2860. doi:10.1002/etc.2379
- 379 13. Collins JP, Storfer A. Global amphibian declines: Sorting the hypotheses. *Divers Distrib.*  
380 2003;9: 89–98. doi:10.1046/j.1472-4642.2003.00012.x
- 381 14. Hayes TB, Falso P, Gallipeau S, Stice M. The cause of global amphibian declines: a  
382 developmental endocrinologist’s perspective. *J Exp Biol.* 2010;213: 921–933.  
383 doi:10.1242/jeb.040865
- 384 15. Brühl CA, Schmidt T, Pieper S, Alscher A. Terrestrial pesticide exposure of amphibians: An  
385 underestimated cause of global decline? *Sci Rep.* 2013;3: 1135. doi:10.1038/srep01135
- 386 16. Adams E, Brühl CA. Fungicide Exposure Induces Sensitivity Differences in Aquatic Life  
387 Stages of European Common Frogs (*Rana temporaria*). *J Herpetol.* 2020;54: 331–336.  
388 doi:10.1670/19-004
- 389 17. Wells KD. The ecology and behavior of amphibians. Chicago: The University of Chicago  
390 Press; 2007.
- 391 18. Honkanen JO, Kukkonen JVK. Environmental temperature changes uptake rate and  
392 bioconcentration factors of bisphenol A in tadpoles of *Rana temporaria*. *Environ Toxicol*  
393 *Chem.* 2006; doi:10.1897/05-586R1.1
- 394 19. Boone MD, Bridges CM. The effect of temperature on the potency of carbaryl for survival of  
395 tadpoles of the green frog (*Rana clamitans*). *Environ Toxicol Chem.* 1999;18: 1482–1484.  
396 doi:10.1897/1551-5028(1999)018<1482:TEOTOT>2.3.CO;2
- 397 20. Materna EJ, Rabeni CF, Lapoint TW. Effects of the synthetic pyrethroid insecticide,  
398 esfenvalerate, on larval leopard frogs (*Rana spp.*). *Environ Toxicol Chem.* 1995;14: 613–622.

399 doi:10.1002/etc.5620140409

400 21. Lau ETC, Karraker NE, Leung KMY. Temperature-dependent acute toxicity of methomyl  
401 pesticide on larvae of 3 Asian amphibian species. *Environ Toxicol Chem.* 2015;34: 2322–  
402 2327. doi:10.1002/etc.3061

403 22. Baier F, Jedinger M, Gruber E, Zaller JG. Temperature-Dependence of Glyphosate-Based  
404 Herbicide's Effects on Egg and Tadpole Growth of Common Toads. *Front Environ Sci.*  
405 2016;4: 1–10. doi:10.3389/fenvs.2016.00051

406 23. Baier F, Gruber E, Hein T, Bondar-Kunze E, Ivanković M, Mentler A, et al. Non-target effects  
407 of a glyphosate-based herbicide on Common toad larvae (*Bufo bufo*, Amphibia) and  
408 associated algae are altered by temperature. *PeerJ.* 2016;4: e2641. doi:10.7717/peerj.2641

409 24. Chiari Y, Glaberman S, Serén N, Carretero MA, Capellini I. Phylogenetic signal in amphibian  
410 sensitivity to copper sulfate relative to experimental temperature. *Ecol Appl.* 2015;25: 596–  
411 602. doi:10.1890/14-0439.1

412 25. Carpenter JK, Monks JM, Nelson N. The effect of two glyphosate formulations on a small,  
413 diurnal lizard (*Oligosoma polychroma*). *Ecotoxicology.* Springer US; 2016;25: 548–554.  
414 doi:10.1007/s10646-016-1613-2

415 26. IPCC. Climate Change 2013: The Physical Science Basis. Contribution of Working Group I to  
416 the Fifth Assessment Report of the Intergovernmental Panel on Climate Change. Stocker T.,  
417 Qin D, Plattner G-K, Tignor M, Allen SK, Boschung J, et al., editors. Cambridge, United  
418 Kingdom and New York, NY, USA: Cambridge University Press; 2013.  
419 doi:10.1017/CBO9781107415324.Summary

420 27. Baumgartner C, Bitschi N, Ellinger N, Gollmann B, Gollmann G, Köck M. Laichablage und

- 421 Embryonalentwicklung von Springfrosch (*Rana dalmatina* BONAPARTE , 1840) und  
422 Grasfrosch (*Rana temporaria* LINNAEUS , 1758) in einem syntopen Vorkommen.  
423 Herpetozoa. 1996;9: 133–150.
- 424 28. Sztatecsny M, Gallauner A, Klotz L, Baiarl A, Schabetsberger R. The presence of common  
425 frogs ( *Rana temporaria* ) increases the body condition of syntopic Alpine newts ( *Ichthyosaura*  
426 *alpestris* ) in oligotrophic high-altitude ponds : benefits of high-energy prey in a low-  
427 productivity habitat. 2013;2450: 209–215.
- 428 29. Roßberg D, Ipach R. Erhebungen zur Anwendung von Pflanzenschutzmitteln im Weinbau. J  
429 für Kult. 2015;67: 410–416. doi:10.5073/JFK.2015.12.03
- 430 30. Zubrod JP, Bundschuh M, Arts G, Brühl CA, Imfeld G, Knäbel A, et al. Fungicides: An  
431 Overlooked Pesticide Class? Environ Sci Technol. 2019;53: 3347–3365.  
432 doi:10.1021/acs.est.8b04392
- 433 31. Kuzmin S, Ishchenko V, Tuniyev B, Beebee T, Andreone F, Nyström P, et al. *Rana*  
434 *temporaria* (European Common Frog). IUCN Red List Threat Species. 2009;  
435 e.T58734A86470817.  
436 doi:<http://dx.doi.org/10.2305/IUCN.UK.2009.RLTS.T58734A11834246.en>
- 437 32. Aghasyan A, Avci A, Tuniyev B, Crnobrnja-Isailovic J, Lymberakis P, Andrén C, et al.  
438 *Bufo viridis*. IUCN Red List Threat Species. 2015; e.T155333A86444583.  
439 doi:<http://dx.doi.org/10.2305/IUCN.UK.2015-1.RLTS.T155333A74514442.en>
- 440 33. Wagner N, Viertel B. Chapter 16. The Use of Aquatic Life-stages of European Amphibians in  
441 Toxicological Studies. In: Larramendy ML, editor. Ecotoxicology and Genotoxicology: Non-  
442 traditional Aquatic Models. Royal Society of Chemistry; 2017. pp. 371–406.

443 doi:10.1039/9781782629887-00371

444 34. Günther R. Die Amphibien und Reptilien Deutschlands. Heidelberg: Spektrum Akademischer  
445 Verlag; 2009.

446 35. Muir AP, Biek R, Mable BK. Behavioural and physiological adaptations to low-temperature  
447 environments in the common frog, *Rana temporaria*. BMC Evol Biol. 2014;14: 1–11.  
448 doi:10.1186/1471-2148-14-110

449 36. Loman J. Breeding phenology in *Rana temporaria*. Local variation is due to pond temperature  
450 and population size. Ecol Evol. 2016;6: 6202–6209. doi:10.1002/ece3.2356

451 37. Drakulić S, Feldhaar H, Lisičić D, Mioč M, Cizelj I, Seiler M, et al. Local differences of  
452 thermal preferences in European common frog (*Rana temporaria* Linnaeus, 1758) tadpoles.  
453 Zool Anz. 2017;268: 47–54. doi:10.1016/j.jcz.2017.04.005

454 38. Derakhshan Z, Nokhbatolfoghahai M. Thermal tolerance limits and effects of temperature on  
455 the growth and development of the green toad, *Bufo viridis*. Salamandra. 2015;51: 129–136.

456 39. Konstantinou IK, Hela DG, Albanis TA. The status of pesticide pollution in surface waters  
457 (rivers and lakes) of Greece. Part I. Review on occurrence and levels. Environ Pollut.  
458 2006;141: 555–570. doi:10.1016/j.envpol.2005.07.024

459 40. Adams E, Leeb C, Brühl CA. Pesticide exposure affects reproductive capacity of common  
460 toads (*Bufo bufo*) in a viticultural landscape. Ecotoxicology. 2021;30: 213–223.  
461 doi:10.1007/s10646-020-02335-9

462 41. Adama. Safety data sheet according to regulation (EC) No. 1907/2006 (REACH) - Product  
463 Number FNG56820-A (Folpan 500 SC). 2015;

- 464 42. Gosner KL. A Simplified Table for Staging Anuran Embryos Larvae with Notes on  
465 Identification. *Herpetologica*. 1960;16: 183–190. doi:10.2307/3890061
- 466 43. Adams E, Leeb C, Roodt AP, Brühl CA. Interspecific sensitivity of European amphibians  
467 towards two pesticides and comparison to standard test species. *Environ Sci Eur*. Springer  
468 Berlin Heidelberg; 2021;33: 1–7. doi:10.1186/s12302-021-00491-1
- 469 44. Dawson DA, Bantle JA. Development of a reconstituted water medium and preliminary  
470 validation of the Frog Embryo Teratogenesis Assay—Xenopus (FETAX). *J Appl Toxicol*.  
471 1987;7: 237–244. doi:10.1002/jat.2550070403
- 472 45. OECD. Test No. 203: Fish, Acute Toxicity Test. OECD Guidelines for the Testing of  
473 Chemicals, Section 2. Paris: OECD Publishing; 2019. doi:10.1787/9789264069961-en
- 474 46. Ritz C, Baty F, Streibig JC, Gerhard D. Dose-Response Analysis Using R. *PLoS One*.  
475 2015;10: e0146021. doi:10.1371/journal.pone.0146021
- 476 47. Wheeler MW, Park RM, Bailer AJ. Comparing median lethal concentration values using  
477 confidence interval overlap or ratio tests. *Environ Toxicol Chem*. 2006;25: 1441–1444.  
478 doi:10.1897/05-320R.1
- 479 48. Altman DG, Bland MJ. How to obtain the P value from a confidence interval. *BMJ*. 2011;  
480 343:d2304. doi:10.1136/bmj.d2304
- 481 49. R Development Core Team. R: A language and environment for statistical computing. R  
482 Foundation for Statistical Computing. Vienna, Austria; 2020. doi:10.1111/j.1365-  
483 2621.1979.tb03829.x
- 484 50. EFSA. Conclusion on the peer review of the pesticide risk assessment of the active substance



- 485 folpet. EFSA Sci Rep. 2009;297: 1–80.
- 486 51. Adams E, Gerstle V, Brühl CA. Dermal Fungicide Exposure at Realistic Field Rates Induces  
487 Lethal and Sublethal Effects on Juvenile European Common Frogs (*Rana temporaria*).  
488 Environ Toxicol Chem. 2021; etc.4972. doi:10.1002/etc.4972
- 489 52. Blaustein AR, Walls SC, Bancroft BA, Lawler JJ, Searle CL, Gervasi SS. Direct and indirect  
490 effects of climate change on amphibian populations. Diversity. 2010;2: 281–313.  
491 doi:10.3390/d2020281
- 492 53. Lötters S, Filz KJ, Wagner N, Schmidt BR, Emmerling C, Veith M. Hypothesizing if  
493 responses to climate change affect herbicide exposure risk for amphibians. Environ Sci Eur.  
494 2014;26: 1–5. doi:10.1186/s12302-014-0031-4
- 495 54. Chmielewski FM, Müller A, Bruns E. Climate changes and trends in phenology of fruit trees  
496 and field crops in Germany, 1961–2000. Agric For Meteorol. 2004;121: 69–78.  
497 doi:10.1016/S0168-1923(03)00161-8
- 498 55. Lavallo C, Micale F, Houston TD, Camia A, Hiederer R, Lazar C, et al. Climate change in  
499 Europe. 3. Impact on agriculture and forestry. A review. Agron Sustain Dev. 2009;29: 433–  
500 446. doi:10.1051/agro/2008068
- 501 56. Delcour I, Spanoghe P, Uyttendaele M. Literature review: Impact of climate change on  
502 pesticide use. Food Res Int. Elsevier Ltd; 2015;68: 7–15. doi:10.1016/j.foodres.2014.09.030
- 503 57. Olesen JE, Bindi M. Consequences of climate change for European agricultural productivity,  
504 land use and policy. Eur J Agron. 2002;16: 239–262. doi:10.1016/S1161-0301(02)00004-7
- 505 58. Bundschuh M, Elsaesser D, Stang C, Schulz R. Mitigation of fungicide pollution in detention

- 506 ponds and vegetated ditches within a vine-growing area in Germany. *Ecol Eng.* Elsevier B.V.;  
507 2016;89: 121–130. doi:10.1016/j.ecoleng.2015.12.015
- 508 59. Allinson G, Zhang P, Bui AD, Allinson M, Rose G, Marshall S, et al. Pesticide and trace metal  
509 occurrence and aquatic benchmark exceedances in surface waters and sediments of urban  
510 wetlands and retention ponds in Melbourne, Australia. *Environ Sci Pollut Res.* 2015;22:  
511 10214–10226. doi:10.1007/s11356-015-4206-3
- 512 60. Leeb C, Brühl C, Theissinger K. Potential pesticide exposure during the post-breeding  
513 migration of the common toad (*Bufo bufo*) in a vineyard dominated landscape. *Sci Total*  
514 *Environ.* 2020;706: 134430. doi:10.1016/j.scitotenv.2019.134430
- 515 61. Rohr JR, Sesterhenn TM, Stieha C. Will climate change reduce the effects of a pesticide on  
516 amphibians?: Partitioning effects on exposure and susceptibility to contaminants. *Glob Chang*  
517 *Biol.* 2011;17: 657–666. doi:10.1111/j.1365-2486.2010.02301.x
- 518

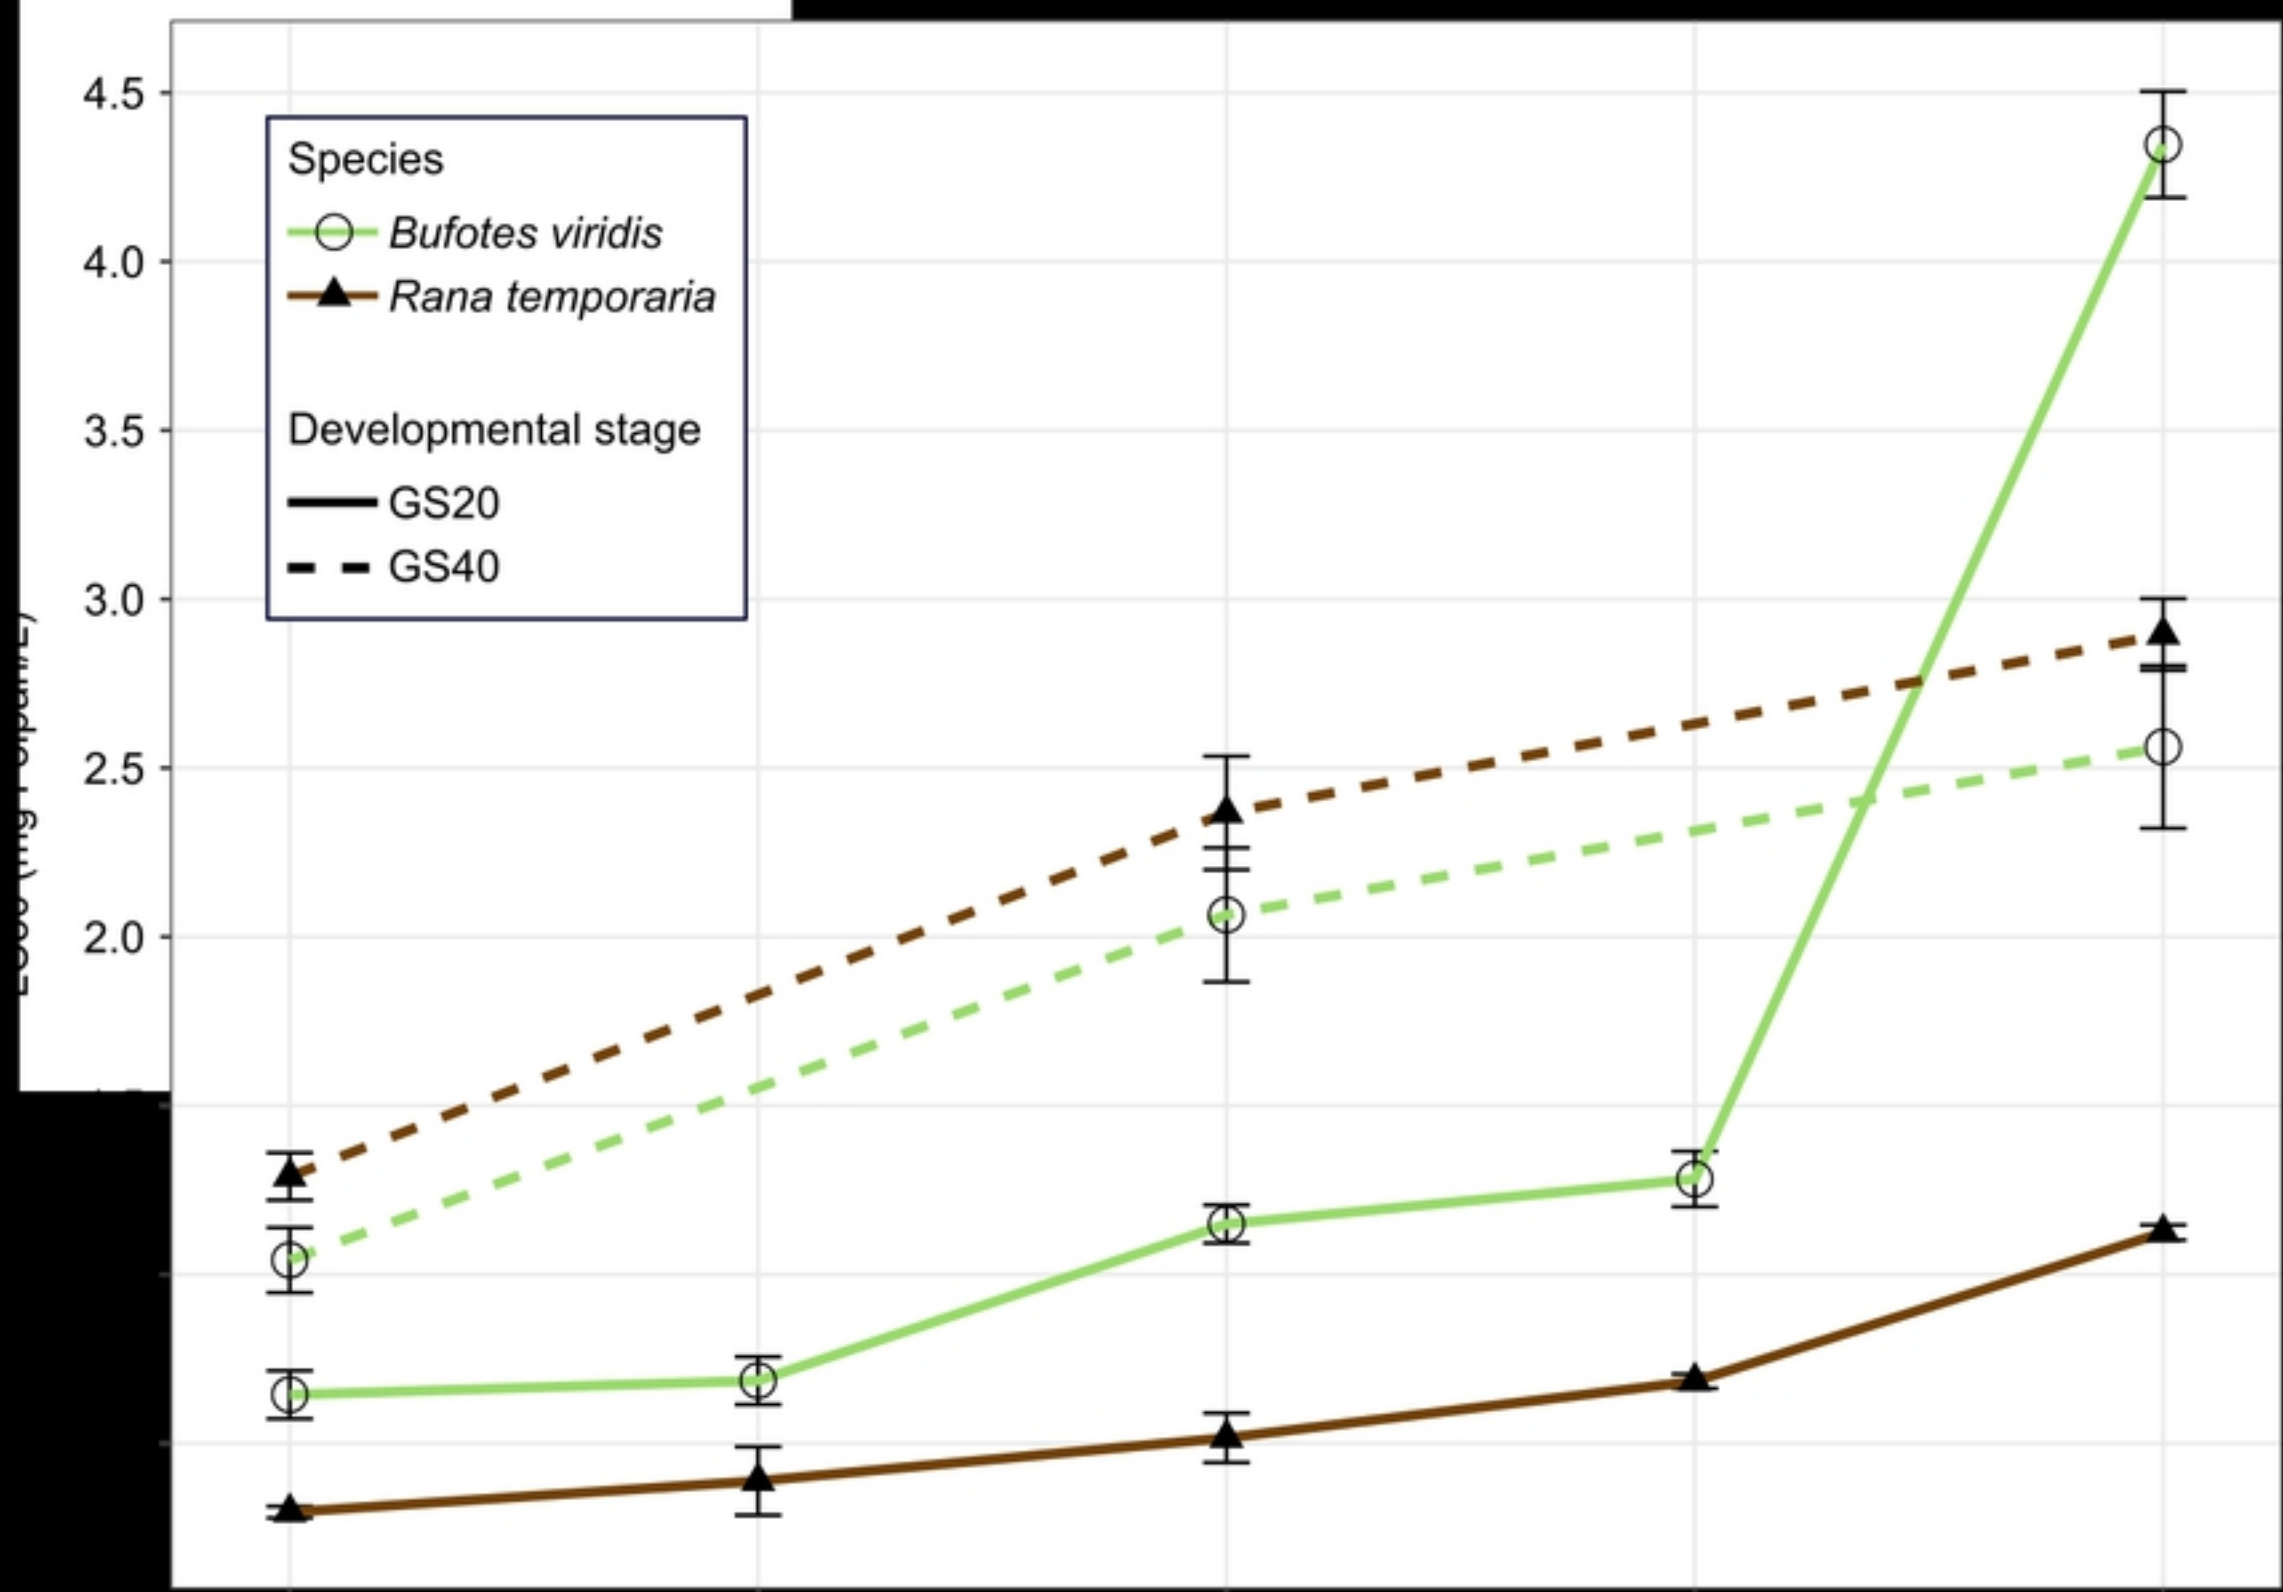

Figure 1
